# Supplementary material for: Geographical Distribution of E-cadherin Germline Mutations in the Context of Diffuse Gastric Cancer: A Systematic Review
Source: PubMed Central journal article supplement (PMC8001745; doi:10.3390/cancers13061269), 2021-03-12

## Supplementary Materials: Geographical Distribution of E-cadherin Germline Mutations in the Context of Diffuse Gastric Cancer: A Systematic Review

Giovanni Corso, Federica Corso, Federica Bellerba, Patrícia Carneiro, Susana Seixas, Antonio Cioffi, Carlo La Vecchia, Francesca Magnoni, Bernardo Bonanni, Paolo Veronesi, Sara Gandini and Joana Figueiredo

Table S1. *CDH1* germline mutations identified in Series Study group.

| First Author    | Country     | Type        | HGVS                | Protein Change | ClinVar/LOVD Classification  | In Vitro Data | SIFT      | PolyPhen-2        | Mean Age Carriers | Carriers | Mean Age Screened | Screened | Criteria   |
|-----------------|-------------|-------------|---------------------|----------------|------------------------------|---------------|-----------|-------------------|-------------------|----------|-------------------|----------|------------|
| Shin [29]       | Korea       | Missense    | 2494G>A             | V832M          | Benign                       | Function loss | Damaging  | Probably damaging | 60                | 7        | 64                | 305      | Unselected |
| Guindalini [30] | Brasil      | Missense    | 313T>A              | S105T          | VUS                          | Not studied   | Tolerated | Benign            | 41                | 1        | 39                | 88       | EOGG       |
|                 | Brasil      | Missense    | 387G>T              | Q129H          | Not submitted                | Not studied   | Tolerated | Benign            | -                 | 1        | -                 | -        | -          |
|                 | Brasil      | Missense    | 1676G>A             | S559N          | Not submitted                | Not studied   | Tolerated | Benign            | -                 | 1        | -                 | -        | -          |
|                 | Brasil      | Missense    | 1806C>A             | F602L          | Not submitted                | Not studied   | Tolerated | Benign            | -                 | 1        | -                 | -        | -          |
| Kim [31]        | Korea       | Missense    | 2494G>A             | V832M          | Benign                       | Function loss | Damaging  | Probably damaging | 37                | 2        | 70                | 107      | Unselected |
| Hakkaart [32]   | New Zealand | Non sense   | 190C>T              | -              | Pathogenic                   | -             | -         | -                 | 33                | 4        | 56                | 94       | HDGC       |
|                 | New Zealand | Non sense   | 1792C>T             | -              | Pathogenic                   | -             | -         | -                 | -                 | 4        | -                 | -        | -          |
|                 | New Zealand | Non sense   | 2195G>A             | -              | Likely pathogenic            | -             | -         | -                 | -                 | 1        | -                 | -        | -          |
|                 | New Zealand | Non sense   | 2287G>T             | -              | Pathogenic/Likely pathogenic | -             | -         | -                 | -                 | 4        | -                 | -        | -          |
|                 | New Zealand | Insertion   | 2382insC            | -              | Pathogenic                   | -             | -         | -                 | -                 | 4        | -                 | -        | -          |
| Tedaldi [33]    | Italy       | Deletion    | 1-?_163+?del        | -              | Not submitted                | -             | -         | -                 | 41                | 1        | ?                 | 79       | HDGC       |
|                 | Italy       | Non sense   | 308G>A              | -              | Pathogenic                   | -             | -         | -                 | -                 | 1        | -                 | -        | -          |
|                 | Italy       | Deletion    | 360delG             | -              | Pathogenic                   | -             | -         | -                 | -                 | 1        | -                 | -        | -          |
|                 | Italy       | Non sense   | 781G>T              | -              | Likely pathogenic            | -             | -         | -                 | -                 | 2        | -                 | -        | -          |
|                 | Italy       | Non sense   | 1003C>T             | -              | Pathogenic                   | -             | -         | -                 | -                 | 1        | -                 | -        | -          |
|                 | Italy       | Non sense   | 1137G>A             | -              | Pathogenic                   | -             | -         | -                 | -                 | 1        | -                 | -        | -          |
|                 | Italy       | Deletion    | 1965delG            | -              | Not submitted                | -             | -         | -                 | -                 | 1        | -                 | -        | -          |
|                 | Italy       | Deletion    | 2114delT            | -              | Not submitted                | -             | -         | -                 | -                 | 1        | -                 | -        | -          |
| Molinaro [34]   | Italy       | Splice site | 688-1G>C            | -              | Not submitted                | -             | -         | -                 | 39                | 1        | 42                | 30       | HDGC       |
|                 | Italy       | Missense    | 2315T>A             | L772Q          | Not submitted                | Not studied   | Damaging  | Probably damaging | -                 | 1        | -                 | -        | -          |
|                 | Italy       | Deletion    | 833-476_1138-463del | -              | Not submitted                | -             | -         | -                 | -                 | 1        | -                 | -        | -          |
|                 | Italy       | Imbalance   | Allelic Imbalance   | -              | Not submitted                | -             | -         | -                 | -                 | 1        | -                 | -        | -          |
|                 | Italy       | Non sense   | 187C>T              | -              | Pathogenic                   | -             | -         | -                 | -                 | 1        | -                 | -        | -          |
|                 | Italy       | Missense    | 1901C>T             | A634V          | Likely pathogenic            | Function loss | Tolerated | Benign            | -                 | 1        | -                 | -        | -          |

|               |                 |             |                   |       |                      |                  |           |                   |    |   |     |     |            |
|---------------|-----------------|-------------|-------------------|-------|----------------------|------------------|-----------|-------------------|----|---|-----|-----|------------|
| Garziera [35] | Italy           | Splice site | -71C>G            | -     | Benign/Likely benign | -                | -         | -                 | ?  | 3 | 61  | 59  | Unselected |
|               | Italy           | Missense    | 820G>A            | G274S | Likely benign        | Retains function | Damaging  | Probably damaging | -  | 1 | -   | -   | -          |
|               | Italy           | Missense    | 892G>A            | A298T | Benign               | Function loss    | Damaging  | Probably damaging | -  | 1 | -   | -   | -          |
|               | Italy           | Missense    | 1409C>T           | T470I | Benign               | Function loss*   | Damaging  | Probably damaging | -  | 1 | -   | -   | -          |
|               | Italy           | Splice site | 1937-13T>C        | -     | Benign               | -                | -         | -                 | -  | 2 | -   | -   | -          |
| Garziera [35] | Italy           | Missense    | 1774G>A           | A592T | Benign               | Retains function | Damaging  | Possibly damaging | -  | 1 | -   | -   | -          |
| Bacani [36]   | Canada          | Splice site | -117G>A           | -     | Not submitted        | -                | -         | -                 | ?  | 1 | <51 | 58  | EOGC       |
|               | Canada          | Splice site | -71C>G            | -     | Not submitted        | -                | -         | -                 | -  | 2 | -   | 58  | -          |
|               | Canada          | Deletion    | 41delT            | -     | Pathogenic           | -                | -         | -                 | -  | 1 | -   | 59  | -          |
|               | Canada          | Splice site | 48+5C>G           | -     | Not submitted        | -                | -         | -                 | -  | 1 | -   | 58  | -          |
|               | Canada          | Splice site | 48+15C>G          | -     | Not submitted        | -                | -         | -                 | -  | 2 | -   | 58  | -          |
|               | Canada          | Splice site | 387+26C>T         | -     | Not submitted        | -                | -         | -                 | -  | 1 | -   | 76  | -          |
|               | Canada          | Splice site | 1937+13T>C        | -     | Benign               | -                | -         | -                 | -  | 2 | -   | 27  | -          |
|               | Canada          | Splice site | 2295+53G>A        | -     | VUS                  | -                | -         | -                 | -  | 1 | -   | 76  | -          |
| Corso [37]    | Italy           | Splice site | -63C>A            | -     | Not submitted        | -                | -         | -                 | 42 | 1 | 42  | 21  | EOGC       |
| Oliveira [38] | North Europa    | Deletion    | Del exon 1–2      | -     | Not submitted        | -                | -         | -                 | 36 | 1 | ?   | 93  | HDGC       |
|               | Canada          | Deletion    | Del exon 1–2      | -     | Not submitted        | -                | -         | -                 | -  | 1 | -   | -   | -          |
|               | Eastern Europa  | Deletion    | Del exon 1–2      | -     | Not submitted        | -                | -         | -                 | -  | 1 | -   | -   | -          |
|               | Southern Europa | Deletion    | Del 50-UTR-exon 1 | -     | Not submitted        | -                | -         | -                 | -  | 1 | -   | -   | -          |
|               | Central Europa  | Deletion    | Del exon 14–16    | -     | Not submitted        | -                | -         | -                 | -  | 1 | -   | -   | -          |
|               | Central Europa  | Deletion    | Del exon 16       | -     | Not submitted        | -                | -         | -                 | -  | 1 | -   | -   | -          |
| Suriano [39]  | Unknown         | Missense    | 3G>C              | MII   | Pathogenic           | Not studied      | Damaging  | Benign            | ?  | 1 | ?   | 31  | HDGC       |
|               | Unknown         | Deletion    | 1063del           | -     | Pathogenic           | -                | -         | -                 | -  | 1 | -   | -   | -          |
|               | Unknown         | Non sense   | 187C>T            | -     | Pathogenic           | -                | -         | -                 | -  | 1 | -   | -   | -          |
|               | Unknown         | Non sense   | 1792C>T           | -     | Pathogenic           | -                | -         | -                 | -  | 1 | -   | -   | -          |
|               | Hispanic        | Splice site | 2161C>G           | -     | VUS                  | -                | -         | -                 | -  | 1 | -   | -   | -          |
|               | Unknown         | Non sense   | 1003C>T           | -     | VUS                  | -                | -         | -                 | -  | 2 | -   | -   | -          |
|               | Unknown         | Deletion    | 2276delG          | -     | Pathogenic           | -                | -         | -                 | -  | 1 | -   | -   | -          |
|               | Caucasian       | Missense    | 1285C>T           | P429S | Pathogenic           | Function loss    | Damaging  | Probably damaging | -  | 1 | -   | -   | -          |
| Chen [40]     | China           | Deletion    | 44_46delTGC       | -     | Not submitted        | -                | -         | -                 | 57 | 2 | 62  | 236 | Unselected |
|               | China           | Missense    | 604G>A            | V202I | Benign               | Not studied      | Tolerated | Benign            | -  | 1 | -   | -   | -          |
|               | China           | Missense    | 1888C>G           | L630V | Benign               | Not studied      | Damaging  | Probably damaging | -  | 1 | -   | -   | -          |
|               | China           | Splice site | 1320+7 A>G        | -     | Not submitted        | -                | -         | -                 | -  | 1 | -   | -   | -          |
| Richards [41] | Ireland         | Splice site | 49-2A>G           | -     | Pathogenic           | -                | -         | -                 | ?  | 1 | ?   | 8   | HDGC       |
|               | Ireland         | Non sense   | 59G>A             | -     | Pathogenic           | -                | -         | -                 | -  | 1 | -   | -   | -          |

|                 |                |             |                       |       |                   |                |           |                   |    |   |   |     |            |
|-----------------|----------------|-------------|-----------------------|-------|-------------------|----------------|-----------|-------------------|----|---|---|-----|------------|
| Hansford [23]   | Hispanic       | Deletion    | del 67328695-67328844 | -     | Not submitted     | -              | -         | -                 | 43 | 1 | ? | 183 | HDGC       |
| Hansford [23]   | Lithuania      | Deletion    | del 67324886-67330557 | -     | Not submitted     | -              | -         | -                 | -  | 1 | - | -   | -          |
|                 | Germany-Hung.  | Deletion    | del 67193822-67387415 | -     | Not submitted     | -              | -         | -                 | -  | 1 | - | -   | -          |
|                 | Eastern Europe | Deletion    | 1-?-163+?del          | -     | Not submitted     | -              | -         | -                 | -  | 1 | - | -   | -          |
|                 | Scotland-Irel. | Missense    | 3G>A                  | M1I   | Likely pathogenic | Not studied    | Damaging  | Benign            | -  | 1 | - | -   | -          |
|                 | France-Canada  | Splice site | 48+1G>A               | -     | Pathogenic        | -              | -         | -                 | -  | 1 | - | -   | -          |
|                 | Italy          | Missense    | 79C>T                 | P27S  | VUS               | Not studied    | Tolerated | Benign            | -  | 1 | - | -   | -          |
|                 | Hispanic       | Missense    | 286A>G                | I96V  | Likely benign     | Not studied    | Tolerated | Benign            | -  | 1 | - | -   | -          |
|                 | Lebanon        | Deletion    | 382delC               | -     | Pathogenic        | -              | -         | -                 | -  | 1 | - | -   | -          |
|                 | UK             | Deletion    | 447_453delCAGAAGA     | -     | Pathogenic        | -              | -         | -                 | -  | 1 | - | -   | -          |
|                 | Algeria        | Splice site | 687+1G>T              | -     | Not submitted     | -              | -         | -                 | -  | 1 | - | -   | -          |
|                 | Hispanic       | Missense    | 715G>A                | G239R | Likely pathogenic | Function loss  | Damaging  | Probably damaging | -  | 1 | - | -   | -          |
|                 | Sweden-Germ.   | Splice site | 832+1G>T              | -     | Pathogenic        | -              | -         | -                 | -  | 1 | - | -   | -          |
|                 | Caucasian      | Splice site | 833-2A>G              | -     | Pathogenic        | -              | -         | -                 | -  | 1 | - | -   | -          |
|                 | Europe         | Missense    | 892G>A                | A298T | Benign            | Function loss  | Damaging  | Probably damaging | -  | 1 | - | -   | -          |
|                 | Mexico-Eur.    | Non sense   | 940A>T                | -     | Pathogenic        | -              | -         | -                 | -  | 1 | - | -   | -          |
|                 | Caucasian      | Splice site | 1009-2A>G             | -     | Not submitted     | -              | -         | -                 | -  | 1 | - | -   | -          |
|                 | Germany        | Splice site | 1137G>A               | -     | Pathogenic        | -              | -         | -                 | -  | 1 | - | -   | -          |
|                 | America        | Splice site | 1137G>T               | -     | Likely pathogenic | -              | -         | -                 | -  | 1 | - | -   | -          |
|                 | Unknown        | Splice site | 1137+1G>A             | -     | Likely pathogenic | -              | -         | -                 | -  | 1 | - | -   | -          |
|                 | Caucasian      | Non sense   | 1189A>T               | -     | VUS               | -              | -         | -                 | -  | 1 | - | -   | -          |
|                 | Japan          | Deletion    | 1212delC              | -     | Pathogenic        | -              | -         | -                 | -  | 1 | - | -   | -          |
|                 | Sweden-UK      | Splice site | 1565+1G>A             | -     | Pathogenic        | -              | -         | -                 | -  | 1 | - | -   | -          |
|                 | Caucasian      | Splice site | 1565+1G>C             | -     | Pathogenic        | -              | -         | -                 | -  | 1 | - | -   | -          |
|                 | Arabia         | Splice site | 1565+1G>T             | -     | Pathogenic        | -              | -         | -                 | -  | 1 | - | -   | -          |
|                 | Unknown        | Insertion   | 1565+2dupT            | -     | Pathogenic        | -              | -         | -                 | -  | 1 | - | -   | -          |
|                 | Caucasian      | Missense    | 1679C>G               | T560R | Pathogenic        | Function loss  | Damaging  | Probably damaging | -  | 1 | - | -   | -          |
|                 | Unknown        | Non sense   | 1792C>T               | -     | Pathogenic        | -              | -         | -                 | -  | 1 | - | -   | -          |
|                 | Brasil         | Deletion    | 2058_2059delTG        | -     | Not submitted     | -              | -         | -                 | -  | 1 | - | -   | -          |
|                 | UK-Scotland    | Deletion    | 2100delT              | -     | Pathogenic        | -              | -         | -                 | -  | 1 | - | -   | -          |
|                 | Unknown        | Non sense   | 2265T>A               | -     | Pathogenic        | -              | -         | -                 | -  | 1 | - | -   | -          |
|                 | Unknown        | Deletion    | 2310delC              | -     | Pathogenic        | -              | -         | -                 | -  | 1 | - | -   | -          |
| Hansford [23]   | Jewish         | Missense    | 2413G>A               | D805N | Benign            | Function loss  | Damaging  | Probably damaging | -  | 1 | - | -   | -          |
|                 | UK             | Deletion    | 2430delT              | -     | Pathogenic        | -              | -         | -                 | -  | 1 | - | -   | -          |
| Shinmura [42]   | Japan          | Missense    | 185G>T                | G62V  | VUS               | Function loss* | Damaging  | Probably damaging | 61 | 1 | ? | 13  | Unselected |
| Benusiglio [43] | France         | Non sense   | 1147C>T               | -     | Pathogenic        | -              | -         | -                 | 40 | 1 | ? | 162 | Unselected |
|                 | France         | Deletion    | Del exon 11           | -     | Not submitted     | -              | -         | -                 | -  | 1 | - | -   | -          |
|                 | France         | Splice site | 832+1G>T              | -     | Pathogenic        | -              | -         | -                 | -  | 2 | - | -   | -          |

|                    |           |                    |                         |       |                      |               |           |                   |    |   |     |    |      |
|--------------------|-----------|--------------------|-------------------------|-------|----------------------|---------------|-----------|-------------------|----|---|-----|----|------|
|                    | France    | Deletion           | 2398delC                | -     | Pathogenic           | -             | -         | -                 | -  | 1 | -   | -  | -    |
|                    | France    | Insertion          | 1565+2dup               | -     | Pathogenic           | -             | -         | -                 | -  | 1 | -   | -  | -    |
|                    | France    | Splice site        | 1137G>A                 | -     | Pathogenic           | -             | -         | -                 | -  | 1 | -   | -  | -    |
|                    | France    | Deletion           | 1470–1483del            | -     | Not submitted        | -             | -         | -                 | -  | 2 | -   | -  | -    |
|                    | France    | Splice site        | 1679C>G                 | -     | Pathogenic           | -             | -         | -                 | -  | 1 | -   | -  | -    |
|                    | France    | Deletion           | 469delG                 | -     | Not submitted        | -             | -         | -                 | -  | 1 | -   | -  | -    |
|                    | France    | Deletion           | 2386delC                | -     | Pathogenic           | -             | -         | -                 | -  | 1 | -   | -  | -    |
|                    | France    | Non sense          | 283C>T                  | -     | Pathogenic           | -             | -         | -                 | -  | 1 | -   | -  | -    |
|                    | France    | Missense           | 2343A>T                 | E781D | VUS                  | Function loss | Tolerated | Benign            | -  | 1 | -   | -  | -    |
|                    | France    | Non sense          | 1595G>A                 | -     | Pathogenic           | -             | -         | -                 | -  | 1 | -   | -  | -    |
| Yamada [44]        | Japan     | Deletion           | 1212delC                | -     | Pathogenic           | -             | -         | -                 | 26 | 2 | ?   | 13 | HDGC |
|                    | Japan     | Deletion           | 164-?_387+?del          | -     | Not submitted        | -             | -         | -                 | -  | 1 | -   | -  | -    |
| Brooks-Wilson [20] | Europe    | Splice site        | 687+1G>A                | -     | Likely pathogenic    | -             | -         | -                 | 38 | 1 | 45  | 35 | HDGC |
|                    | Caucasian | Insertion          | 1779dupC                | -     | Not submitted        | -             | -         | -                 | -  | 1 | -   | -  | -    |
|                    | Unknown   | Deletion           | 2310delC                | -     | Pathogenic           | -             | -         | -                 | -  | 1 | -   | -  | -    |
|                    | Unknown   | Missense           | 1225T>C                 | W409R | Not submitted        | Function loss | Damaging  | Probably damaging | -  | 1 | -   | -  | -    |
|                    | Caucasian | Deletion           | 1212delC                | -     | Pathogenic           | -             | -         | -                 | -  | 1 | -   | -  | -    |
|                    | Italy     | Deletion           | 382delC                 | -     | Pathogenic           | -             | -         | -                 | -  | 1 | -   | -  | -    |
|                    | Europe    | Splice site        | 1711+5G>A               | -     | Pathogenic           | -             | -         | -                 | -  | 1 | -   | -  | -    |
|                    | Turkey    | Missense           | 2195G>A                 | R732Q | Likely pathogenic    | Function loss | Damaging  | Probably damaging | -  | 1 | -   | -  | -    |
|                    | USA       | Deletion           | 2064_2065delTG          | -     | Not submitted        | -             | -         | -                 | -  | 1 | -   | -  | -    |
|                    | Unknown   | Deletion           | 1476_1477delAGdel       | -     | Not submitted        | -             | -         | -                 | -  | 1 | -   | -  | -    |
|                    | Caucasian | Insertion          | 1064dupT                | -     | Not submitted        | -             | -         | -                 | -  | 1 | -   | -  | -    |
|                    | Europe    | Missense           | 892G>A                  | A298T | Benign               | Function loss | Damaging  | Probably damaging | -  | 1 | -   | -  | -    |
|                    | Caucasian | Deletion-insertion | 1135_1137+5delinsTTA GA | -     | Pathogenic           | -             | -         | -                 | -  | 1 | -   | -  | -    |
| Suriano [45]       | Portugal  | Missense           | 1901C>T                 | A634V | Likely pathogenic    | Function loss | Tolerated | Benign            | 41 | 1 | <51 | 66 | EOGC |
|                    | UK        | Splice site        | 532-18 C>T              | -     | Benign/Likely benign | -             | -         | -                 | -  | 1 | -   | -  | -    |
|                    | Portugal  | Splice site        | 532-18 C>T              | -     | Benign/Likely benign | -             | -         | -                 | -  | 1 | -   | -  | -    |
| Kim [46]           | Korea     | Missense           | 715G>A                  | G239R | Likely pathogenic    | Function loss | Damaging  | Probably damaging | 38 | 1 | <51 | 25 | EOGC |
|                    | Korea     | Non sense          | 1003C>T                 | -     | Pathogenic           | -             | -         | -                 | -  | 1 | -   | -  | -    |
|                    | Korea     | Non sense          | 1003C>T                 | -     | Pathogenic           | -             | -         | -                 | -  | 1 | -   | -  | -    |
| Yoon [47]          | Korea     | Missense           | 731A>G                  | D244G | VUS                  | Not studied   | Damaging  | Probably damaging | 44 | 1 | 41  | 5  | HDGC |
|                    | Korea     | Missense           | 1460T>C                 | V487G | Pathogenic           | Not studied   | Tolerated | Possibly damaging | -  | 1 | -   | -  | -    |

|               |            |             |           |       |               |                  |           |                   |    |   |    |     |            |
|---------------|------------|-------------|-----------|-------|---------------|------------------|-----------|-------------------|----|---|----|-----|------------|
| Tsukanov [48] | Russia     | Deletion    | 1005delA  | -     | Not submitted | -                | -         | -                 | ?  | 1 | ?  | 9   | Unselected |
| Kim [49]      | Korea      | Missense    | 1018A>G   | T340A | Benign        | Function loss    | Damaging  | Benign            | 30 | 6 | ?  | 131 | Unselected |
| Zhang [50]    | China      | Missense    | 1018A>G   | T340A | Benign        | Function loss    | Damaging  | Benign            | ?  | 2 | ?  | 101 | Unselected |
| Wang [51]     | Japan      | Missense    | 1243A>C   | I415L | VUS           | Unconclusive     | Damaging  | Benign            | ?  | 3 | ?  | 101 | Unselected |
| Keller [52]   | Germany    | Deletion    | 372delC   | -     | Not submitted | -                | -         | -                 | 41 | 1 | ?  | 35  | HDGC       |
|               | Germany    | Missense    | 2396C>G   | P799R | VUS           | Function loss    | Damaging  | Probably damaging | -  | 1 | -  | -   | -          |
|               | Germany    | Insertion   | 1619dupG  | -     | Pathogenic    | -                | -         | -                 | -  | 1 | -  | -   | -          |
| Ascano [53]   | USA        | Missense    | 1849G>A   | A617T | Benign        | Retains function | Tolerated | Benign            | 64 | 1 | ?  | 40  | Unselected |
| Yabuta [54]   | Japan      | Missense    | 2494G>A   | V832M | Benign        | Function loss    | Damaging  | Probably damaging | 50 | 1 | 55 | 17  | HDGC       |
| El-Husny [55] | Brasil     | Nonsense    | 1023T>G   |       | Pathogenic    | -                | -         | -                 | 33 | 2 | ?  | 6   | HDGC       |
| Humar [56]    | Caucasian  | Deletion    | 53delC    | -     | Pathogenic    | -                | -         | -                 | 41 | 1 | 45 | 10  | HDGC       |
|               | Arabia     | Splice site | 1565+1G>T | -     | Pathogenic    | -                | -         | -                 | -  | 1 | -  | -   | -          |
|               | Maori      | Non sense   | 1792C>T   | -     | Pathogenic    | -                | -         | -                 | -  | 1 | -  | -   | -          |
|               | Caucasian  | Splice site | 2295+5G>A | -     | Not submitted | -                | -         | -                 | -  | 1 | -  | -   | -          |
|               | Africa-Am. | Deletion    | 1710delT  | -     | Pathogenic    | -                | -         | -                 | -  | 1 | -  | -   | -          |
| Roviello [57] | Italy      | Missense    | 1118C>T   | P373L | Likely benign | Function loss    | Damaging  | Probably damaging | 79 | 1 | 65 | 14  | HDGC       |

Table S2. CDH1 germline mutations identified in Family Study group).

| First Author    | Country     | Type        | HGVS                 | Protein Change       | ClinVar/LOVD Class. | In Vitro Data | SIFT      | PolyPhen-2        | Age Proband | CDH1m TOT | CDH1m KG | Mean Age CDH1mKG | CDH1m OtherK | Mean Age CDH1m OtherK | CDH1wt |
|-----------------|-------------|-------------|----------------------|----------------------|---------------------|---------------|-----------|-------------------|-------------|-----------|----------|------------------|--------------|-----------------------|--------|
| Norero [58]     | Chile       | Non sense   | 1531C>T              | -                    | Pathogenic          | -             | -         | -                 | 22          | 6         | 2        | 21               | 0            | 0                     | 2      |
| Katona [59]     | USA         | Splice site | 1566-2A>G            | -                    | Likely pathogenic   | -             | -         | -                 | 43          | 5         | 1        | 43               | 1            | 75 (PR)               | 0      |
| Obermair [60]   | Austria     | Splice site | 687+1G > A           | -                    | Likely pathogenic   | -             | -         | -                 | ?           | 5         | 3        | 46               | 0            | 0                     | 5      |
| Pena-Couso [61] | Spain       | Missense    | 1679C>G              | T560R                | Pathogenic          | Function loss | Damaging  | Probably damaging | ?           | 8         | 3        | 36               | 0            | 0                     | 1      |
|                 | Spain       | Missense    | 1679C>G              | T560R                | Pathogenic          | Function loss | Damaging  | Probably damaging | ?           | 2         | 2        | 28               | 0            | 0                     | 2      |
|                 | Spain       | Missense    | 1679C>G              | T560R                | Pathogenic          | Function loss | Damaging  | Probably damaging | 33          | 8         | 2        | 41               | 0            | 0                     | 4      |
| Gullo [62]      | Portugal    | Missense    | 1901C>T              | A634V                | Likely pathogenic   | Function loss | Tolerated | Benign            | 18          | 15        | 7        | 33               | 1            | 45 (LBR)              | 15     |
| Caggiari [63]   | Italy       | Deletion    | 1612delG             | -                    | Pathogenic          | -             | -         | -                 | 41          | 2         | 1        | 41               | 0            | 0                     | 0      |
| Betés [64]      | Spain       | Missense    | 977T>A               | I326N                | Not submitted       | Function loss | Damaging  | Probably damaging | 44          | 3         | 3        | 48               | 0            | 0                     | 0      |
| Yelskaya [65]   | USA         | Splice site | 1679C>G              | -                    | Pathogenic          | -             | -         | -                 | 50          | 3         | 3        | 52               | 0            | 0                     | 0      |
| López [66]      | Spain       | Deletion    | 1220_1220delC        | -                    | Not submitted       | -             | -         | -                 | 47          | 3         | 2        | 35               | 1            | 49 (CO)               | 3      |
| Zhang [67]      | Hispanic    | Missense    | 48G>C                | Q16H                 | Not submitted       | Function loss | Damaging  | Probably damaging | 22          | 2         | 2        | 41               | 0            | 0                     | 0      |
| Sugimoto [68]   | Japan       | Deletion    | 1566-?_1711??del     | -                    | Not submitted       | -             | -         | -                 | 41          | 2         | 1        | 41               | 0            | 0                     | 2      |
| Yamada [69]     | Japan       | Deletion    | Large del exons 7-16 | -                    | Not submitted       | -             | -         | -                 | 34          | 2         | 2        | 32               | 0            | 0                     | 0      |
| Bardram [70]    | Denmark     | Deletion    | 602_603delCT         | -                    | Not submitted       | -             | -         | -                 | 32          | 4         | 1        | 32               | 0            | 0                     | 2      |
|                 | Denmark     | Insertion   | 1565+3insTT          | -                    | Pathogenic          | -             | -         | -                 | 44          | 12        | 5        | 53               | 1            | 27 (CA)               | 9      |
| More [71]       | Caucasian   | Splice site | 49-2A>C              | -                    | Pathogenic          | -             | -         | -                 | 42          | 4         | 3        | 55               | 1            | 55 (CO)               | 1      |
|                 | Caucasian   | Missense    | 353C>G               | T118R                | VUS                 | Function loss | Tolerated | Benign            | 55          | 4         | 1        | 55               | 0            | 0                     | 2      |
|                 | Caucasian   | Missense    | 715G>A               | G239R                | Likely pathogenic   | Function loss | Damaging  | Probably damaging | 30          | 2         | 1        | 30               | 0            | 0                     | 2      |
|                 | Hispanic    | Deletion    | 1107delC             | -                    | Pathogenic          | -             | -         | -                 | 48          | 1         | 1        | 48               | 0            | 0                     | 0      |
|                 | Caucasian   | Splice site | 1137G>A              | -                    | Pathogenic          | -             | -         | -                 | 29          | 4         | 2        | 29               | 1            | 36 (TO)               | 2      |
|                 | Caucasian   | Deletion    | 1391_1392delTC       | -                    | Pathogenic          | -             | -         | -                 | 34          | 1         | 1        | 34               | 0            | 0                     | 0      |
|                 | Maori       | Missense    | 1901C>T              | A634V                | Likely pathogenic   | Function loss | Tolerated | Benign            | 35          | 1         | 1        | 35               | 0            | 0                     | 0      |
|                 | China       | Non sense   | 2095C>T              | -                    | Pathogenic          | -             | -         | -                 | 39          | 1         | 1        | 39               | 0            | 0                     | 0      |
| Caucasian       | Splice site | 2440-6C>G   | -                    | Benign/Likely benign | -                   | -             | -         | 36                | 1           | 1         | 36       | 0                | 0            | 3                     |        |
| Kluijt [72]     | Unknown     | Deletion    | 55_74del20           | -                    | Not submitted       | -             | -         | -                 | 27          | 1         | 1        | 27               | 0            | 0                     | 0      |
|                 | Unknown     | Non sense   | 187C>T               | -                    | Pathogenic          | -             | -         | -                 | 41          | 3         | 1        | 41               | 0            | 0                     | 0      |
|                 | Unknown     | Non sense   | 489C>A               | -                    | Pathogenic          | -             | -         | -                 | ?           | 3         | 2        | 49               | 1            | 44 (LBR)              | 0      |

|                        |               |                 |                   |       |                   |               |           |                   |    |     |     |         |   |          |    |
|------------------------|---------------|-----------------|-------------------|-------|-------------------|---------------|-----------|-------------------|----|-----|-----|---------|---|----------|----|
|                        | Hindustan     | Deletion-ins    | 811_812delins12   | -     | Not submitted     | -             | -         | -                 | 55 | 4   | 2   | 55      | 0 | 0        | 1  |
|                        | Unknown       | Deletion-ins    | 1135_1137+5delins | -     | Pathogenic        | -             | -         | -                 | ?  | 2   | 1   | 40      | 0 | 0        | 0  |
| Kluijt [72]            | Unknown       | Deletion        | 1404delC          | -     | Not submitted     | -             | -         | -                 | ?  | 11  | 9   | 43      | 0 | 0        | 21 |
|                        | Unknown       | Deletion        | 1476_1477delAG    | -     | Pathogenic        | -             | -         | -                 | 42 | 2   | 1   | 42      | 0 | 0        | 0  |
|                        | Unknown       | Splice site-ins | 1565+2dupT        | -     | Pathogenic        | -             | -         | -                 | ?  | 16  | 14  | 47      | 0 | 0        | 9  |
|                        | Creole        | Missense        | 1748T>G           | L583R | Pathogenic        | Function loss | Damaging  | Probably damaging | 40 | 2   | 2   | 29      | 0 | 0        | 0  |
|                        | Turkey        | Missense        | 2195G>A           | R732Q | Likely pathogenic | Function loss | Damaging  | Probably damaging | 38 | 3/4 | 1/2 | 38      | 0 | 0        | 0  |
| Guilford [73]          | Europe        | Insertion       | 1588insC          | -     | Pathogenic        | -             | -         | -                 | 40 | 3   | 3   | 50      | 0 | 0        | 0  |
|                        | Europe        | Non sense       | 70G>T             | -     | Pathogenic        | -             | -         | -                 | ?  | 6   | 3   | 43      | 1 | 39 (BR)  | 1  |
|                        | Africa-Americ | Splice site     | 1137+1G>A         | -     | Likely pathogenic | -             | -         | -                 | 25 | 3   | 3   | 25      | 0 | 0        | 0  |
|                        | Europe        | Non sense       | 586G>T            | -     | Pathogenic        | -             | -         | -                 | 31 | 1   | 1   | 31      | 0 | 0        | 0  |
|                        | Maori         | Non sense       | 190C>T            | -     | Pathogenic        | -             | -         | -                 | 22 | 1   | 1   | 22      | 0 | 0        | 0  |
|                        | Unknown       | Frameshift      | 1487del7          | -     | Pathogenic        | -             | -         | -                 | 31 | 1   | 1   | 31      | 0 | 0        | 0  |
| Dussaulx-Garin [74]    | France        | Non sense       | 283C>T            | -     | Pathogenic        | -             | -         | -                 | ?  | 3   | 3   | 44      | 0 | 0        | 0  |
| Keller [75]            | Germany       | Deletion        | 377delC           | -     | Pathogenic        | -             | -         | -                 | 38 | 2   | 2   | 48      | 1 | 49 (LBR) | 1  |
| Frebourg [76]          | Caucasian     | Splice site     | 531+2T>A          | -     | Pathogenic        | -             | -         | -                 | 23 | 4   | 3   | 32      | 1 | 23 (CA)  | 2  |
| Norton [77]            | USA           | Non sense       | 1003C>T           | -     | Pathogenic        | -             | -         | -                 | ?  | 14  | 11  | 51      | 0 | 0        | 9  |
| Rogers [78]            | USA           | Insertion       | 1565+2insT        | -     | Pathogenic        | -             | -         | -                 | ?  | 3   | 3   | 57      | 0 | 0        | 2  |
|                        | USA           | Deletion        | 2395delC          | -     | Not submitted     | -             | -         | -                 | 42 | 4   | 1   | 42      | 0 | 0        | 5  |
| Guilford [79]          | Maori         | Splice site     | 1008G>T           | -     | Likely pathogenic | -             | -         | -                 | ?  | 39  | 9   | 36      | 1 | 74 (CO)  | 0  |
|                        | Maori         | Non sense       | 2095C>T           | -     | Pathogenic        | -             | -         | -                 | 30 | 1   | 1   | 30      | 0 | 0        | 0  |
|                        | Maori         | Frameshift      | 2386dupC          | -     | Pathogenic        | -             | -         | -                 | ?  | 3   | 2   | 26      | 0 | 0        | 0  |
| Oliveira [38]          | Portugal      | Deletion-ins    | 1135_1137+5delins | -     | Pathogenic        | -             | -         | -                 | 52 | 1   | 1   | 53      | 0 | 0        | 1  |
|                        | Portugal      | Missense        | 1901C>T           | A634V | Likely pathogenic | Function loss | Tolerated | Benign            | 23 | 1   | 1   | 23      | 0 | 0        | 0  |
| Mayrbaeurl [80]        | Austria       | Deletion-ins    | 1304_1305insA     | -     | Pathogenic        | -             | -         | -                 | 49 | 10  | 7   | Unknown | 0 | 0        | 1  |
| Jiang [81]             | China         | Non sense       | 1507C>T           | -     | Pathogenic        | -             | -         | -                 | 48 | 1   | 1   | 48      | 0 | 0        | 4  |
| Rodriguez-Sanjuan [82] | Spain         | Deletion        | 1610delC          | -     | Pathogenic        | -             | -         | -                 | 58 | 9   | 3   | 60      | 0 | 0        | 0  |
| Shah [83]              | USA           | Non sense       | 1792C>T           | -     | Pathogenic        | -             | -         | -                 | 25 | 2   | 2   | 38      | 0 | 0        | 3  |
| Van Domselaar [84]     | Spain         | Non sense       | 1913G>A           | -     | Pathogenic        | -             | -         | -                 | 28 | 1   | 1   | 28      | 0 | 0        | 0  |
| Ghaffari [85]          | Iran          | Non sense       | 2275G>T           | -     | Pathogenic        | -             | -         | -                 | 37 | 2   | 0   | 37      | 0 | 0        | 2  |
|                        | Europe        | Non sense       | 187C>T            | -     | Pathogenic        | -             | -         | -                 | ?  | 5   | 2   | Unknown | 0 | 0        | 2  |

|               |             |             |                      |       |                   |               |           |                   |    |    |    |         |   |                       |    |
|---------------|-------------|-------------|----------------------|-------|-------------------|---------------|-----------|-------------------|----|----|----|---------|---|-----------------------|----|
|               | Europe      | Insertion   | 1711+1dupG           | -     | Pathogenic        | -             | -         | -                 | ?  | 3  | 3  | 51      | 0 | 0                     | 3  |
|               | Europe      | Non sense   | 1792C>T              | -     | Pathogenic        | -             | -         | -                 | ?  | 2  | 2  | 25      | 0 | 0                     | 0  |
| Kaurah [19]   | Unknown     | Non sense   | 283C>T               | -     | Pathogenic        | -             | -         | -                 | ?  | 1  | 1  | Unknown | 0 | 0                     | 0  |
|               | Filipine    | Missense    | 715G>A               | G239R | Likely pathogenic | Function loss | Damaging  | Probably damaging | ?  | 1  | 1  | Unknown | 0 | 0                     | 0  |
|               | Unknown     | Splice site | 1137G>A              | -     | Pathogenic        | -             | -         | -                 | ?  | 1  | 1  | -       | 0 | 0                     | 0  |
|               | Italy       | Splice site | 1137G>A              | -     | Pathogenic        | -             | -         | -                 | ?  | 2  | 2  | -       | 0 | 0                     | 0  |
|               | Sweden      | Splice site | 1137G>A              | -     | Pathogenic        | -             | -         | -                 | ?  | 1  | 1  | -       | 0 | 0                     | 0  |
|               | UK          | Deletion    | 1397-1398delTC       | -     | Pathogenic        | -             | -         | -                 | ?  | 1  | 1  | -       | 0 | 0                     | 0  |
|               | Ireland     | Insertion   | 1682dupA             | -     | Pathogenic        | -             | -         | -                 | ?  | 1  | 1  | -       | 0 | 0                     | 0  |
|               | UK          | Missense    | 1901C>T              | A634V | Likely pathogenic | Function loss | Tolerated | Benign            | ?  | 2  | 2  | -       | 0 | 0                     | 0  |
|               | Portugal    | Missense    | 1901C>T              | A634V | Likely pathogenic | Function loss | Tolerated | Benign            | ?  | 1  | 1  | -       | 0 | 0                     | 0  |
|               | Portugal    | Missense    | 1901C>T              | A634V | Likely pathogenic | Function loss | Tolerated | Benign            | ?  | 1  | 1  | -       | 0 | 0                     | 0  |
|               | Spanish     | Non sense   | 1913G>A              | -     | Pathogenic        | -             | -         | -                 | ?  | 1  | 1  | -       | 0 | 0                     | 0  |
|               | Germany     | Deletion    | 2064-2065delTG       | -     | Pathogenic        | -             | -         | -                 | ?  | 2  | 2  | -       | 0 | 0                     | 0  |
|               | UK-Scotland | Deletion    | 2064-2065delTG       | -     | Pathogenic        | -             | -         | -                 | ?  | 1  | 1  | -       | 0 | 0                     | 0  |
|               | Unknown     | Splice site | 2164+5G>A            | -     | Not submitted     | -             | -         | -                 | ?  | 1  | 1  | -       | 0 | 0                     | 0  |
|               | Unknown     | Missense    | 2195G>A              | R732Q | VUS               | Function loss | Damaging  | Probably damaging | ?  | 1  | 1  | -       | 0 | 0                     | 0  |
|               | UK          | Missense    | 2195G>A              | R732Q | VUS               | Function loss | Damaging  | Probably damaging | ?  | 3  | 3  | -       | 0 | 0                     | 0  |
|               | Colombia    | Missense    | 2245C>T              | R749W | VUS               | Function loss | Damaging  | Probably damaging | ?  | 1  | 1  | -       | 0 | 0                     | 0  |
|               | UK          | Missense    | 2343A>T              | E781D | VUS               | Function loss | Tolerated | Benign            | ?  | 1  | 1  | -       | 0 | 0                     | 0  |
|               | France      | Deletion    | 2398delC             | -     | Pathogenic        | -             | -         | -                 | ?  | ?  | 2  | ?       | ? | ?                     | ?  |
|               | UK-Ireland  | Deletion    | 2398delC             | -     | Pathogenic        | -             | -         | -                 | 39 | ?  | 1  | 39      | ? | ?                     | ?  |
|               | UK-Ireland  | Deletion    | 2398delC             | -     | Pathogenic        | -             | -         | -                 | 34 | ?  | 2  | ?       | ? | ?                     | ?  |
|               | UK-Ireland  | Deletion    | 2398delC             | -     | Pathogenic        | -             | -         | -                 | 53 | ?  | 4  | ?       | ? | ?                     | ?  |
|               |             |             |                      |       |                   |               |           |                   |    |    |    |         |   |                       |    |
| Oliveira [86] | Pakistan    | Splice site | 832G>A               | -     | Pathogenic        | -             | -         | -                 | ?  | 4  | 3  | 37      | 1 | LBR (Unknown)         | 0  |
|               | Europe      | Missense    | 1018A>G              | T340A | Benign            | Function loss | Damaging  | Benign            | 47 | 1  | 1  | 47      | 0 | 0                     | 0  |
|               | Europe      | Insertion   | 1472dupA             | -     | Pathogenic        | -             | -         | -                 | 30 | 1  | 1  | 30      | 0 | 0                     | 0  |
|               | Europe      | Insertion   | 44dupT               | -     | Pathogenic        | -             | -         | -                 | 59 | 4  | 1  | 30      | 3 | CO(70,59)<br>LBR (70) | 0  |
| Caron [87]    | France      | Deletion    | 2399delC             | -     | Pathogenic        | -             | -         | -                 | 45 | 7  | 6  | 31      | 0 | 0                     | 8  |
| Black [88]    | Hawaii      | Non sense   | trp20stop            | -     | Not submitted     | -             | -         | -                 | 22 | 1  | 1  | 22      | 0 | 0                     | 0  |
| Oliveira [89] | Europe      | Deletion    | 1135_1137+5deletions | -     | Pathogenic        | -             | -         | -                 | 27 | 4  | 4  | 35      | 0 | 0                     | 2  |
| Lynch [90]    | USA         | Non sense   | 1003C>T              | -     | Pathogenic        | -             | -         | -                 | 58 | 12 | 11 | 59      | 0 | 0                     | 8  |
| -             | USA         | Non sense   | 70G>T                | -     | Pathogenic        | -             | -         | -                 | 51 | 12 | 5  | 41      | 3 | BR (57,46,39)         | 11 |



---

|            |     |           |         |                         |               |          |                   |    |   |   |    |   |         |   |
|------------|-----|-----------|---------|-------------------------|---------------|----------|-------------------|----|---|---|----|---|---------|---|
| Lynch [90] | USA | Missense  | 2195G>A | R732Q Likely pathogenic | Function loss | Damaging | Probably damaging | 58 | 8 | 3 | 46 | 0 | 0       | 4 |
| -          | USA | Non sense | 1792C>T | - Pathogenic            | -             | -        | -                 | 42 | 6 | 1 | 61 | 1 | BR (58) | 3 |

---

“?” means “Unknown”.

**Table S3.** *CDH1* germline mutations identified in Unknown Study group (\*Unpublished data).

| First Author          | Country     | Type        | HGVS                  | Protein Change | ClinVar/LOVD Classification  | In Vitro Data    | SIFT      | PolyPhen-2        |
|-----------------------|-------------|-------------|-----------------------|----------------|------------------------------|------------------|-----------|-------------------|
| Guilford* [79]        | Unknown     | Missense    | 2T>C                  | M1T            | Not submitted                | Not studied      | Damaging  | Possibly damaging |
|                       | Unknown     | Insertion   | 46_48insTGC           | -              | Not submitted                | -                | -         | -                 |
|                       | Unknown     | Non sense   | 1023T>G               | -              | Pathogenic                   | -                | -         | -                 |
|                       | Unknown     | Insertion   | 753insG               | -              | Not submitted                | -                | -         | -                 |
|                       | Unknown     | Non sense   | 2287G>T               | -              | Pathogenic                   | -                | -         | -                 |
| Caldas-Hansford* [23] | Unknown     | Non sense   | 67C>T                 | -              | Not submitted                | -                | -         | -                 |
|                       | Europe      | Missense    | 641T>C                | L214P          | Pathogenic                   | Function loss    | Damaging  | Probably damaging |
|                       | Caucasian   | Splice site | 1009-2delAG           | -              | Not submitted                | -                | -         | -                 |
|                       | Arabia      | Splice site | 1137G>A               | -              | Pathogenic                   | -                | -         | -                 |
|                       | UK          | Insertion   | 1466dupC              | -              | Pathogenic                   | -                | -         | -                 |
|                       | Unknown     | Deletion    | 1733delC              | -              | Not submitted                | -                | -         | -                 |
|                       | UK-Scotland | Deletion    | 2100delT              | -              | Pathogenic                   | -                | -         | -                 |
|                       | Unknown     | Missense    | 2248G>A               | D750N          | VUS                          | Unconclusive     | Damaging  | Probably damaging |
| UK                    | Deletion    | 2400delG    | -                     | Not submitted  | -                            | -                | -         |                   |
| Simoes-Correia [91]   | Portugal    | Missense    | 641T>C                | L214P          | Pathogenic                   | Function loss    | Damaging  | Probably damaging |
|                       | Portugal    | Missense    | 554A>T                | E185V          | VUS                          | Retains function | Tolerated | Benign            |
|                       | Portugal    | Missense    | 695C>G                | S232C          | VUS                          | Retains function | Damaging  | Probably damaging |
| Charlton [92]         | USA         | Non sense   | 2287G>T               | -              | Pathogenic/Likely pathogenic | -                | -         | -                 |
| van der Post [21]     | Unknown     | Deletion    | 971del                | -              | Not submitted                | -                | -         | -                 |
|                       | Unknown     | Splice site | 2439+5_2439+8 delGTAA | -              | Not submitted                | -                | -         | -                 |

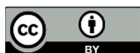

Supplement: cancers-13-01269-s001.pdf [file cancers-13-01269-s001.pdf]
